# Supplementary material for: Diversifying Water Sources with Atmospheric Water Harvesting to Enhance Water Supply Resilience
Source: MDPI journal article supplement (doi:10.3390/su14137783), 2022-06-26
Supplement: s1 [file s1]

*Supplementary Information*

# **Diversifying Water Sources with Atmospheric Water Harvesting to Enhance Water Supply Resilience**

**Mengbo Zhang, Ranbin Liu \* and Yaxuan Li**

Sino-Dutch R&D Centre for Future Wastewater Treatment Technologies/Key Laboratory of Urban Stormwater System and Water Environment (Ministry of Education), Beijing University of Civil Engineering & Architecture, Beijing 100044, China; zmb11211324@163.com (M.Z.); fank812@hotmail.com (Y.L.)

\* Correspondence: ranbin\_liu@hotmail.com

## **Tables**

Table S1. Summary of studies or practices of atmospheric water harvesting

Table S2. Summary of desiccants explored and developed in various studies

Table S3. Summary of atmospheric water harvesting machines on the market

## **Figures**

Figure S1. Summary of atmospheric water harvesting technologies in practical application

**Table S1.** Summary of studies or practices of atmospheric water harvesting

| Location/Test conditions     | Mesh type/ modification                                                              | Fog collection rate<br>L/(m <sup>2</sup> ·day) | Reference |
|------------------------------|--------------------------------------------------------------------------------------|------------------------------------------------|-----------|
| Iberian                      | Raschel mesh                                                                         | 3.9                                            | [1]       |
| Morocco                      | Raschel mesh                                                                         | 10.5                                           | [2]       |
| Guatemala                    | /                                                                                    | 6                                              | [3]       |
| Chile                        | Raschel mesh                                                                         | 7.8                                            | [4]       |
| Peru                         | /                                                                                    | 11.8                                           | [3]       |
| V=0.19 m/s, T=25°C, RH=40%   | Raschel mesh with electrospun polyvinylidene fluoride fibers                         | 15.36                                          | [5]       |
| T=23°C, RH=90%               | Polymer filament with hydrophilic-hydrophobic coating                                | 6.90                                           | [6]       |
| T=25°C, RH=85-90%            | Stable hybrid superhydrophilic-superhydrophobic surface                              | 410.4                                          | [7]       |
| v=30-50 cm/s, RH=50-60%      | Unique layered structure of bi-<br>onic wheat awn                                    | 1416                                           | [8]       |
| T=11.8 ± 1.2°C, RH=29 ± 2.5% | Superhydrophilic surfaces with hierarchical groove structure of wire electrical      | 172.8                                          | [9]       |
| T=11.8 ± 1.2°C, RH=29 ± 2.5% | Superhydrophobic aluminum alloy surfaces with parallel hierarchical ribbed structure | 69.12                                          | [10]      |
| T=20°C, RH=80%               | Slippery-superhydrophilic surfaces with the wedge structure                          | 502.8-536.88                                   | [11]      |
| T=20°C, RH=80%               | Magnetically transformable microcilia surface                                        | 235.2                                          | [12]      |

**Table S2.** Summary of desiccants explored and developed in various studies

| Desiccant                   | Experimental conditions | Adsorption capacity<br>g/g | Reference |
|-----------------------------|-------------------------|----------------------------|-----------|
| Silica gel LiCl-PVP         | T=20°C, RH=70%          | 0.43                       | [13]      |
| LiCl/MgSO <sub>4</sub> /ACF | RH=35%                  | 0.92                       | [14]      |
| Nano-vapor adsorbent        | RH=60%                  | 1.6                        | [15]      |
| LiCl@MIL-101(Cr)            | RH=30%                  | 0.77                       | [16]      |

|                                      |           |           |      |
|--------------------------------------|-----------|-----------|------|
| Super moisture-absorbent gels (SMAG) | RH=90%    | 6.7       | [17] |
| MOF-801                              | RH=20%    | 2.8       | [18] |
| MOF-801                              | RH=5-40%  | 0.1       | [19] |
| MOF-303                              | RH=5-40%  | 0.233     | [19] |
| waste-derived moisture-absorber      | RH=20-80% | 0.46-1.84 | [20] |

**Table S3.** Summary of atmospheric water harvesting machines on the market

| Company        | Generation type   | Generation capacity L/day | Water price \$/m <sup>3</sup> | Energy efficiency kWh/m <sup>3</sup> | Infrastructure cost \$/unit | Reference |
|----------------|-------------------|---------------------------|-------------------------------|--------------------------------------|-----------------------------|-----------|
| Watergen       | Condensation      | 6000                      | 90                            | 200 (Heat exchange)                  | 100000                      | [21]      |
| Drinkable air  | Condensation      | 150,000                   | 60                            | -                                    | -                           | [22]      |
| WEDEW          | Condensation      | 2,000                     | 20                            | (biomass)                            | -                           | [23]      |
| Drupps         | Liquid absorption | 200,000                   | 20                            | 30-130 (Thermal or electric energy)  | -                           | [24]      |
| AquaBoy Pro II | Condensation      | 10-20                     | -                             | -                                    | 1700                        | [25]      |
| GEN-M          | Condensation      | 16                        | 20                            | 10 (Solar energy)                    | 5000-8000                   | [26]      |
| SOURCE         | Absorption        | 2-5                       | -                             | Solar energy                         | 2750-3250                   | [27]      |
| CloudFisher    | Fog-harvesting    | 1100                      | 2.5-3.0                       | 0                                    | 8000-13000                  | [28]      |

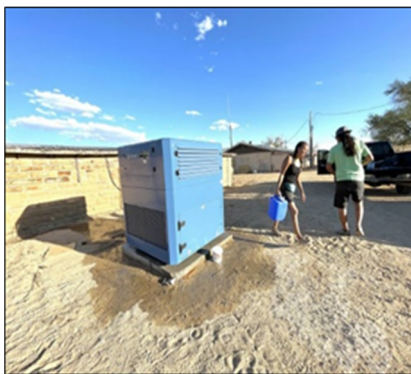

(a)

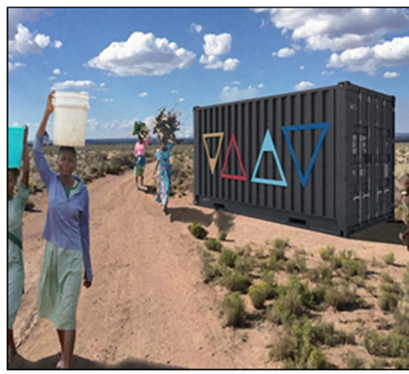

(b)

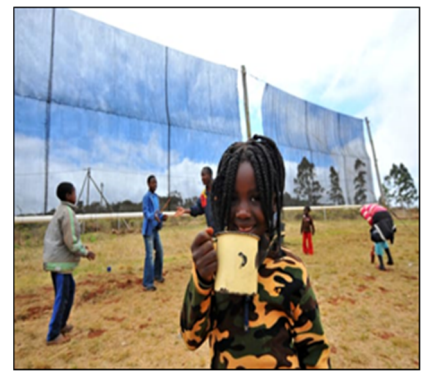

(c)

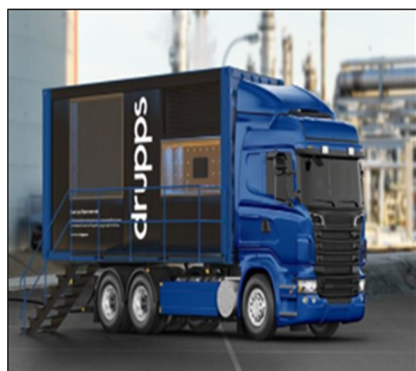

(d)

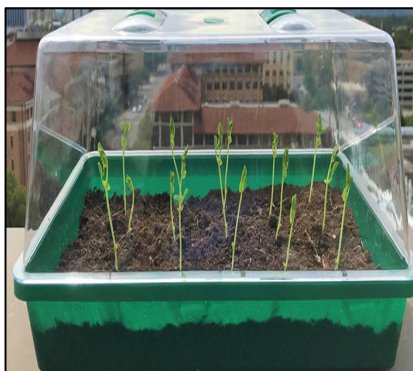

(e)

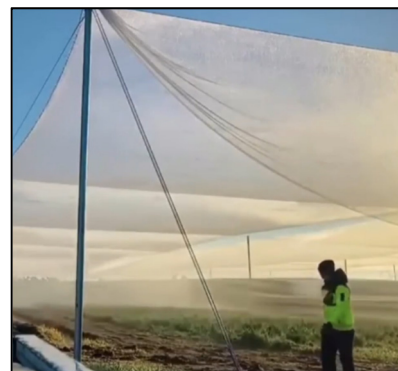

(f)

**Figure S1.** Summary of atmospheric water harvesting technologies in practical application. (a) Wattergen's [26], installed at the Rocky Ridge Gas and Market, can produce up to 800 liters of water extracted from air for the community. It has been implemented in countries such as Asia, the Middle East, Latin America, Africa, and the United States to meet the needs of small villages, parks, residential buildings, farms, schools; (b) Residents use the new device [23] that can use biomass fuel such as the byproducts of agriculture, forestry, and natural disasters to collect clean drinking after a hurricane in Manila, a rural village in Zimbabwe; (c) CloudFisher in South Africa [28]. The fog collector is suitable for areas with frequent fog throughout the year. These areas are usually located at coastal regions and/or mountainous areas such as Chile, Mexico, Oman, South Africa and Morocco. These countries usually have poor economy, and lack or have no pipe network and power facilities; (d) Drupps sells to Thailand [29], A mobile demo version of Drupps System which use the liquid desiccant to extract 800 liters water from the atmosphere with the aim of recycling waste heat from other processes. The energy efficiency starts at 50 kWh/m<sup>3</sup>; (e) The new type of soil made of adsorbent hydrogel is used for self-irrigation technology, which can extract water from the air and distribute it to plants. Depending on the crop, about 0.1-1 kg of soil can provide enough water to irrigate about one square meter of farmland [30]; (f) By laying a mesh overhead the farmland, farmers on-site artificially hit the mesh to irrigate the crops.

## References

- Estrela, M.J.; Corell, D.; Valiente, J.A.; Azorin-Molina, C.; Chen, D. Spatio-Temporal Variability of Fog-Water Collection in the Eastern Iberian Peninsula: 2003–2012. *Atmospheric Research* **2019**, *226*, 87–101, doi:10.1016/j.atmosres.2019.04.016.
- Dodson, L.L.; Bargach, J. Harvesting Fresh Water from Fog in Rural Morocco: Research and Impact Dar Si Hmad's Fogwater Project in Ait Baamrane. In Proceedings of the Procedia Engineering; Elsevier Ltd, **2015**; Vol. 107, pp. 186–193.
- Fessehaye, M.; Abdul-Wahab, S.A.; Savage, M.J.; Kohler, T.; Gherezghiher, T.; Hurni, H. Fog-Water Collection for Community Use. *Renewable and Sustainable Energy Reviews* **2014**, *29*, 52–62. <https://doi.org/10.1016/j.rser.2013.08.063>.
- Larrain, H.; Velásquez, F.; Cereceda, P.; Espejo, R.; Pinto, R.; Osses, P.; Schemenauer, R.S. Fog Measurements at the Site "Falda Verde" North of Chañaral Compared with Other Fog Stations of Chile. *Atmospheric Research* **2002**, *64*, 273–284. doi:10.1016/S0169-8095(02)00098-4.
- Knapczyk-Korczak, J.; Szewczyk, P.K.; Ura, D.P.; Berent, K.; Stachewicz, U. Hydrophilic Nanofibers in Fog Collectors for Increased Water Harvesting Efficiency. *RSC Advances* **2020**, *10*, 22335–22342, doi:10.1039/d0ra03939j.
- Nguyen, L.T.; Bai, Z.; Zhu, J.; Gao, C.; Liu, X.; Wagaye, B.T.; Li, J.; Zhang, B.; Guo, J. Three-Dimensional Multilayer Vertical Filament Meshes for Enhancing Efficiency in Fog Water Harvesting. *ACS Omega* **2021**, *6*, 3910–3920, doi:10.1021/acsomega.0c05776.
- Feng, J.; Zhong, L.; Guo, Z. Sprayed Hierarchical Biomimetic Superhydrophilic-Superhydrophobic Surface for Efficient Fog Harvesting. *Chemical Engineering Journal* **2020**, *388*, 124283. doi:10.1016/j.cej.2020.124283.
- Xiao, L.; Li, G.; Cai, Y.; Cui, Z.; Fang, J.; Cheng, H.; Zhang, Y.; Duan, T.; Zang, H.; Liu, H.; et al. Programmable 3D Printed Wheat Awn-like System for High-Performance Fogdrop Collection. *Chemical Engineering Journal* **2020**, *399*, 125139. doi:10.1016/j.cej.2020.125139.
- Wan, Y.; Xu, J.; Lian, Z.; Xu, J. Superhydrophilic Surfaces with Hierarchical Groove Structure for Efficient Fog Collection. *Colloids and Surfaces A: Physicochemical and Engineering Aspects* **2021**, *628*, 127241. doi:10.1016/j.colsurfa.2021.127241.
- Li, J.; Zhou, Y.; Wang, W.; Du, F.; Ren, L. A Bio-Inspired Superhydrophobic Surface for Fog Collection and Directional Water Transport. *Journal of Alloys and Compounds* **2020**, *819*, 152968. doi:10.1016/j.jallcom.2019.152968.

11. Feng, R.; Song, F.; Xu, C.; Wang, X.L.; Wang, Y.Z. A Quadruple-Biomimetic Surface for Spontaneous and Efficient Fog Harvesting. *Chemical Engineering Journal* **2021**, *422*, 130119. doi:10.1016/j.cej.2021.130119.
12. Li, D.; Huang, J.; Han, G.; Guo, Z. A Facile Approach to Achieve Bioinspired PDMS@Fe<sub>3</sub>O<sub>4</sub> Fabric with Switchable Wettability for Liquid Transport and Water Collection. *Journal of Materials Chemistry A* **2018**, *6*, 22741–22748. doi:10.1039/c8ta08993k.
13. Entezari, A.; Ejeian, M.; Wang, R. Modifying Water Sorption Properties with Polymer Additives for Atmospheric Water Harvesting Applications. *Applied Thermal Engineering* **2019**, *161*, 114109. doi:10.1016/j.applthermaleng.2019.114109.
14. Ejeian, M.; Entezari, A.; Wang, R.Z. Solar Powered Atmospheric Water Harvesting with Enhanced LiCl/MgSO<sub>4</sub>/ACF Composite. *Applied Thermal Engineering* **2020**, *176*, 115396. doi:10.1016/j.applthermaleng.2020.115396.
15. Li, R.; Shi, Y.; Wu, M.; Hong, S.; Wang, P. Improving Atmospheric Water Production Yield: Enabling Multiple Water Harvesting Cycles with Nano Sorbent. *Nano Energy* **2020**, *67*, 104255. doi:10.1016/j.nanoen.2019.104255.
16. Xu, J.; Li, T.; Chao, J.; Wu, S.; Yan, T.; Li, W.; Cao, B.; Wang, R. Efficient Solar-Driven Water Harvesting from Arid Air with Metal–Organic Frameworks Modified by Hygroscopic Salt. *Angewandte Chemie - International Edition* **2020**, *59*, 5202–5210, doi:10.1002/anie.201915170.
17. Zhou, X.; Zhang, P.; Zhao, F.; Yu, G. Super Moisture Absorbent Gels for Sustainable Agriculture via Atmospheric Water Irrigation. *ACS Materials Letters* **2020**, *2*, 1419–1422, doi:10.1021/ACSMATERIALSLETT.0C00439.
18. Kim, H.; Rao, S.R.; LaPotin, A.; Lee, S.; Wang, E.N. Thermodynamic Analysis and Optimization of Adsorption-Based Atmospheric Water Harvesting. *International Journal of Heat and Mass Transfer* **2020**, *161*, doi:10.1016/j.ijheatmasstransfer.2020.120253.
19. Fathieh, F.; Kalmutzki, M.J.; Kapustin, E.A.; Waller, P.J.; Yang, J.; Yaghi, O.M. *Practical Water Production from Desert Air*; 2018;
20. Gong, F.; Li, H.; Zhou, Q.; Wang, M.; Wang, W.; Lv, Y.; Xiao, R.; Papavassiliou, D. v. Agricultural Waste-Derived Moisture-Absorber for All-Weather Atmospheric Water Collection and Electricity Generation. *Nano Energy* **2020**, *74*, 104922, doi:10.1016/j.nanoen.2020.104922.
21. Watergen | Water from Air Available online: <https://www.watergen.com/> (accessed on 24 September 2021).
22. Pure & Sustainable Water - Drinkableair Technologies Available online: <https://drinkableair.tech/> (accessed on 24 September 2021).
23. WEDEW — SkySource Available online: <https://www.skysource.org/wedew> (accessed on 24 September 2021).
24. Drupps | Atmospheric Water for All Available online: <https://drupps.com/> (accessed on 24 September 2021).
25. AquaBoy Pro II Available online: [http://www.atmosphericwatersolutions.com/store/p1/AquaBoy\\_Pro\\_II.html](http://www.atmosphericwatersolutions.com/store/p1/AquaBoy_Pro_II.html) (accessed on 8 October 2021).
26. GEN-M | Water from Air Generator | Watergen USA Available online: <https://us.watergen.com/commercial/gen-m/> (accessed on 24 September 2021).
27. Renewable Drinking Water | SOURCE Water Available online: <https://www.source.co/> (accessed on 12 October 2021).
28. CloudFisher | Fognetalliance Available online: <https://www.fognetalliance.org/cloudfisher> (accessed on 24 September 2021).
29. Drupps Sells to Thailand - Drupps Available online: <https://news.cision.com/drupps/r/drupps-sells-to-thailand,c3418869> (accessed on 24 September 2021).
30. Zhao, F.; Zhou, X.; Liu, Y.; Shi, Y.; Dai, Y.; Yu, G. Super Moisture-Absorbent Gels for All-Weather Atmospheric Water Harvesting. *Advanced Materials* **2019**, *31*, 1806446, doi:10.1002/adma.201806446.
